# Supplementary material for: A Citizen Science Approach to Determine Physical Activity Patterns and Demographics of Greenway Users in Winston-Salem, North Carolina
Source: Int J Environ Res Public Health. 2019 Aug 29;16(17):3150. doi: 10.3390/ijerph16173150 (PMC6747415; doi:10.3390/ijerph16173150)
Supplement: Supplementary file 1 [file ijerph-16-03150-s001.pdf]

## Physical Activity Observation Form

**Location:** ☐ Brushy Fork ☐ 4<sup>th</sup> Street ☐ Salem Lake ☐ West End ☐ Strollway

|                       |                             |                              |                            |
|-----------------------|-----------------------------|------------------------------|----------------------------|
| <b>Observer name:</b> | <b>Date:</b> ____/____/____ | <b>Start time:</b> ____:____ | <b>End time:</b> ____:____ |
|-----------------------|-----------------------------|------------------------------|----------------------------|

| Number of Walkers/Runners | YOUTH (2-20 years) |          | ADULT (21-59 years) |          | SENIOR (60+ years) |          |
|---------------------------|--------------------|----------|---------------------|----------|--------------------|----------|
|                           | Moderate           | Vigorous | Moderate            | Vigorous | Moderate           | Vigorous |

|              |  |  |  |  |  |  |
|--------------|--|--|--|--|--|--|
| Female       |  |  |  |  |  |  |
| White        |  |  |  |  |  |  |
| Black        |  |  |  |  |  |  |
| Asian        |  |  |  |  |  |  |
| Hispanic     |  |  |  |  |  |  |
| Other/Unsure |  |  |  |  |  |  |
| Male         |  |  |  |  |  |  |
| White        |  |  |  |  |  |  |
| Black        |  |  |  |  |  |  |
| Asian        |  |  |  |  |  |  |
| Hispanic     |  |  |  |  |  |  |
| Other/Unsure |  |  |  |  |  |  |

| Number of Bike Riders | YOUTH (2-20 years) |          | ADULT (21-59 years) |          | SENIOR (60+ years) |          |
|-----------------------|--------------------|----------|---------------------|----------|--------------------|----------|
|                       | Moderate           | Vigorous | Moderate            | Vigorous | Moderate           | Vigorous |

|              |  |  |  |  |  |  |
|--------------|--|--|--|--|--|--|
| Female       |  |  |  |  |  |  |
| White        |  |  |  |  |  |  |
| Black        |  |  |  |  |  |  |
| Asian        |  |  |  |  |  |  |
| Hispanic     |  |  |  |  |  |  |
| Other/Unsure |  |  |  |  |  |  |
| Male         |  |  |  |  |  |  |
| White        |  |  |  |  |  |  |
| Black        |  |  |  |  |  |  |
| Asian        |  |  |  |  |  |  |
| Hispanic     |  |  |  |  |  |  |
| Other/Unsure |  |  |  |  |  |  |

Activity Level: Moderate = moving at a slow, casual pace; Vigorous = engaged in an activity more vigorous than an ordinary walk

Go to <https://ctsi.wakehealth.edu/community/what-we-do/citizen-science> to input data or scan QR Code

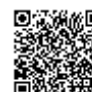

| Conditions of Target Area                                         |                             |                               |                    |
|-------------------------------------------------------------------|-----------------------------|-------------------------------|--------------------|
| Is the area accessible (e.g., not locked or rented to others)?    | _____ Yes                   | _____ No                      |                    |
| Is the area usable (e.g., not excessively wet or windy)?          | _____ Yes                   | _____ No                      |                    |
| Is equipment available in the area (e.g., sport balls available)? | _____ Yes                   | _____ No                      |                    |
| Is the area supervised (e.g., park-related personnel present)?    | _____ Yes                   | _____ No                      |                    |
| Is there organized activity in the area (e.g., group bike ride)?  | _____ Yes                   | _____ No                      |                    |
| Is the area sufficiently lit (if dawn/dusk/nighttime)?            | _____ Yes                   | _____ No                      | _____ NA           |
| Amount of sun or shade in the target area:                        | _____ Mostly<br>_____ shade | _____ Shade/<br>_____ sun mix | _____ Mostly sunny |

**General comments/observations:**
